# Supplementary material for: Self-assembly of hemin on carbon nanotube as highly active peroxidase mimetic and its application for biosensing
Source: Royal Society of Chemistry journal article supplement (doi:10.1039/c3ra22525a), 2013-01-01
Supplement: c3ra22525a.pdf [file c3ra22525a.pdf]

## Supporting Information

### Self-assembly of hemin on carbon nanotube as highly active peroxidase mimetic and its application for biosensing

Yuanfu Zhang, Chunli Xu and Baoxin Li\*

*Key laboratory of Analytical Chemistry for Life Science of Shaanxi Province, School of Chemistry and Chemical Engineering, Shaanxi Normal University, Xi'an 710062, China*

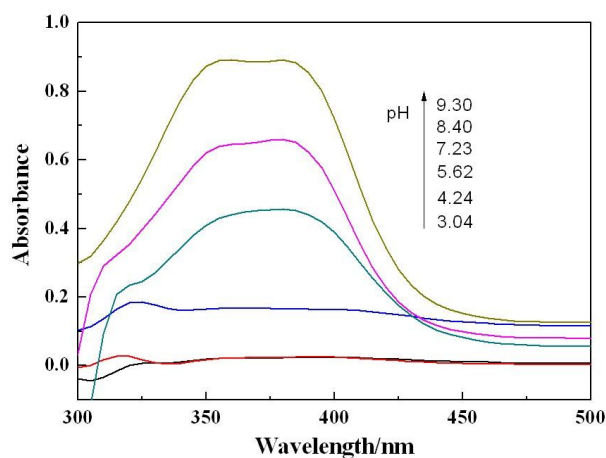

**Figure S1** UV-vis spectra of the supernatant solution of hemin-SWCNT mixture under different pH conditions. Experimental conditions: hemin 45.4  $\mu\text{M}$ , SWCNT 45  $\mu\text{g/mL}$ .

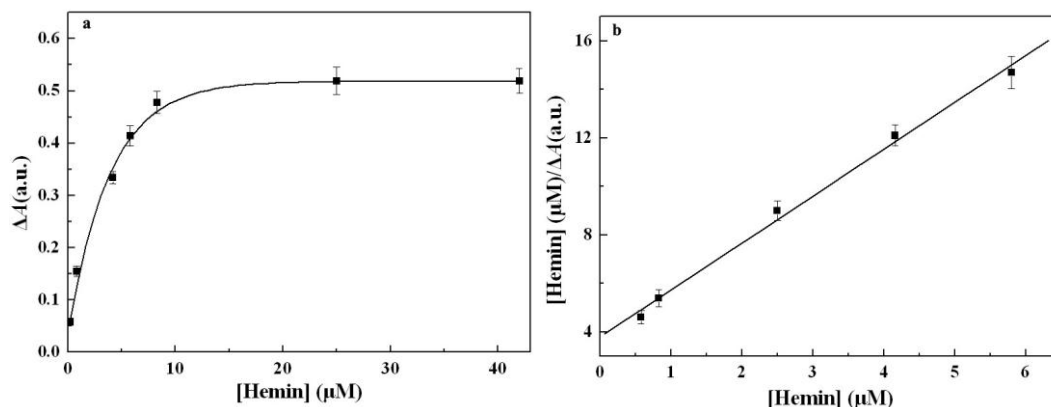

**Figure S2** Langmuir isotherms obtained from the SWCNT interactions with various concentrations of hemin at room temperature. (a) Non-linear regression between  $\Delta A$  and  $[\text{Hemin}]$ ; (b) linear regression between  $[\text{Hemin}]/\Delta A$  and  $[\text{Hemin}]$ . Experimental conditions: SWCNT 400  $\mu\text{g}/\text{mL}$ , 100  $\mu\text{L}$  of 5 mM TMB, 100  $\mu\text{L}$  of  $\text{H}_2\text{O}_2$ , 200  $\mu\text{L}$  of 50 mM NaAc–HAc (pH 4.3), 10 min.

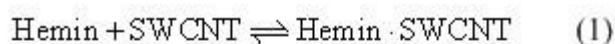

$$K_b = \frac{[\text{Hemin} \cdot \text{SWCNT}]}{[\text{Hemin}][\text{SWCNT}]} \quad (2)$$

$$\Delta A = \Delta A^{\text{max}} \frac{[\text{Hemin}]K_b}{1 + [\text{Hemin}]K_b} \quad (3)$$

$$\frac{[\text{Hemin}]}{\Delta A} = \frac{1}{\Delta A^{\text{max}} K_b} + \frac{[\text{Hemin}]}{\Delta A^{\text{max}}} \quad (4)$$

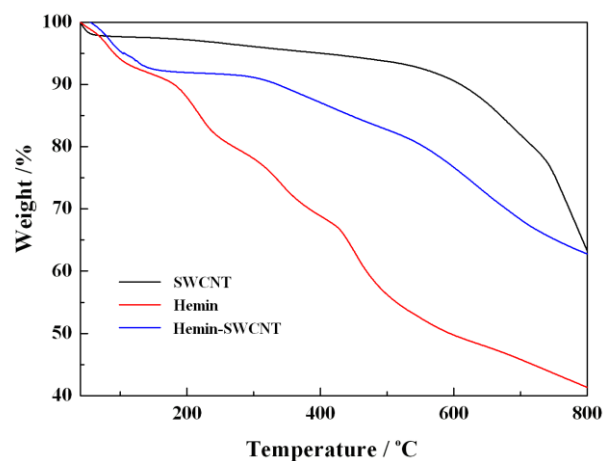

**Figure S3** Thermogravimetric analysis (TGA) for SWCNT (black), hemin (red) and hemin-SWCNT nanohybrid (blue) in N<sub>2</sub> atmosphere.

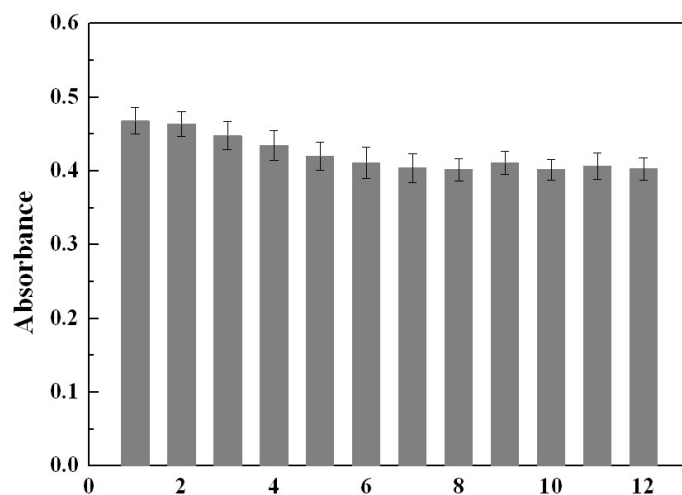

**Figure S4** Effect of recycle number on the catalytic activity of hemin-SWCNT. Experimental conditions: 100  $\mu\text{L}$  of 5 mM TMB, 100  $\mu\text{L}$  of 9.8 mM  $\text{H}_2\text{O}_2$ , 100  $\mu\text{L}$  of 50 mM NaAc–HAc (pH 4.3) 10 min, 37  $^\circ\text{C}$ . The error bars represent the standard deviation of three measurements.

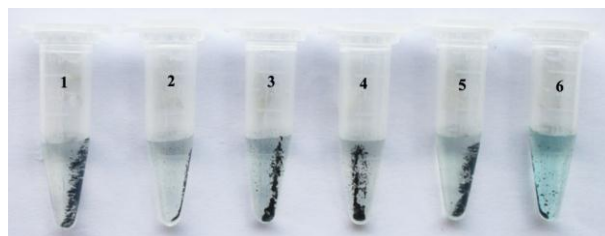

**Figure S5** Photographs of TMB–nanohybrid–GOx in the presence of different sugars: (1) blank, (2) 10 mM lactose, (3) 10 mM maltose, (4) 10 mM fructose, (5) 10 mM sucrose, (6) 50  $\mu\text{M}$  glucose. Experimental conditions: 100  $\mu\text{L}$  of 5 mM TMB, 20  $\mu\text{L}$  of 5  $\text{mg mL}^{-1}$  GOx, 50  $\mu\text{L}$  of SWCNT–hemin nanohybrid, 200  $\mu\text{L}$  of 50 mM NaAc–HAc (pH 4.3).

**Table S1.** Determination of glucose in serum

| Sample | Content<br>( $\mu\text{mol L}^{-1}$ ) | Added<br>( $\mu\text{mol L}^{-1}$ ) | Measured <sup>a</sup><br>( $\mu\text{mol L}^{-1}$ ) | Recovery<br>(%) |
|--------|---------------------------------------|-------------------------------------|-----------------------------------------------------|-----------------|
| 1      | 24.75                                 | 10.00                               | 34.30                                               | 95.5            |
|        |                                       | 20.00                               | 45.10                                               | 101.8           |
| 2      | 15.20                                 | 10.00                               | 25.02                                               | 98.2            |
|        |                                       | 20.00                               | 36.11                                               | 104.6           |
| 3      | 19.95                                 | 10.00                               | 30.14                                               | 101.9           |
|        |                                       | 20.00                               | 39.85                                               | 99.5            |

<sup>a</sup> Average of three replicates.
